# Supplementary material
Source: PubMed Central journal article supplement (PMC1299095)

Hu Suppl. Fig. 1

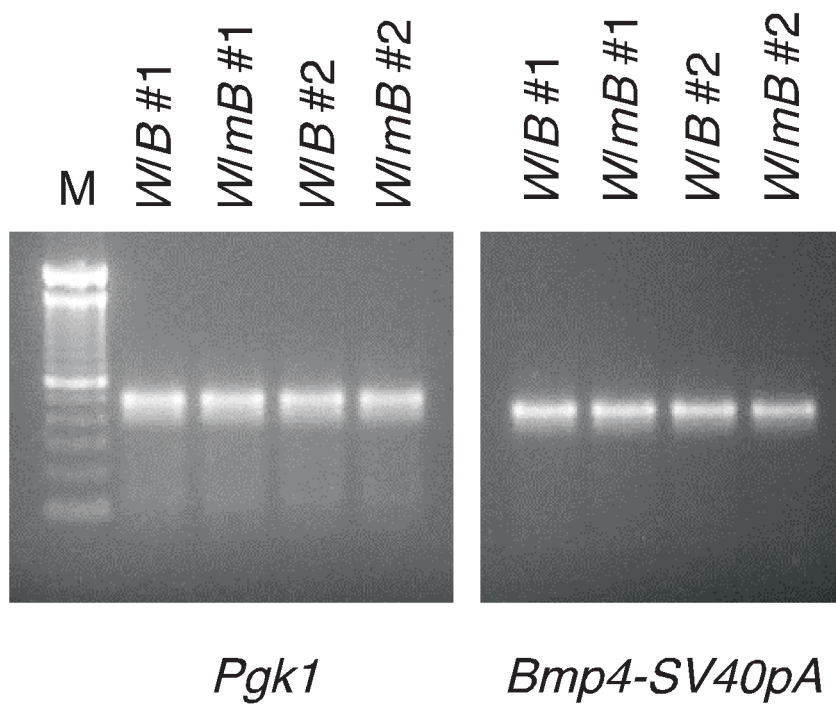

Supplement: 5-7400184s1.pdf [file 5-7400184s1.pdf]
